# Supplementary material for: A Δ-9 Fatty Acid Desaturase Gene in the Microalga Myrmecia incisa Reisigl: Cloning and Functional Analysis
Source: PubMed Central journal article supplement (PMC4964516; doi:10.3390/ijms17071143), 2016-07-16
Supplement: ijms-17-01143-s001.pdf [file ijms-17-01143-s001.pdf]

# Supplementary Materials: A $\Delta$ -9 Fatty Acid Desaturase Gene in the Microalga *Myrmeция incisa* Reisigl: Cloning and Functional Analysis

Wen-Bin Xue, Fan Liu, Zheng Sun and Zhi-Gang Zhou

```

ACGCGGGGAGTGACAACACCAGCTGTCCAACGAAACCTAGTATTCTTT
GTGCACAGCAAACGACTGCCTGTACGTCGTGAAACGCATAGCCCCTTC
TAAACTTCTCGACAGCCCCATCTCTCAAGAACCCGGACAGTCACTGG
CAACCAGGGGAGATGAACCCGAGTGGGCTCACGATGCAGCTCAGCA
CCAGCCTTGCAGGCAGCTGTCCCAGAGTCCCTACCTTCAGCACGCCCTA
GGCAAGCCCAGCCGCAGCTTCGCCTCAGCGTCTCCTGCCAGGCACAGC
GCCGTTGCCGCAGAGGCCCATCTGCCCCACAAGGAGCGGCAACTCA
GAGAAGCCTGTTGGCGAGGCGCCAACGATCATCAATGGCCAGATCTTG
CACAGCCTGTCCGCCACCAGTTAGACCTGGTCAACGGGATGGCGCAG
TATGTTACGGACCAGGTGCTGCTGTGCTCAAGCCCCTGGAGAAGTGC
TGGCAGCCCGCAGACTTCCTGCCCGACCCCGCATCCCCGGACTTCCTG
GACGAGGTGGCAGAGCTCCGGAAGCGCACCGACTGCCTACCGGATGA
CTACCTGGTGGTGTCTATTGGGGACATGATCACGGAGGAGGCGTCCC
CACATGATGGCCATGCTCAACACGCTGGACGGTGTGCGTGACGAGAC
AGGCGCCGCACCGACGCCTTGGGGCAAGTGGACCCGCCAGTGGACAG
CCGAGGAGAACCGTCATGGTGACCTCATGAACAAGTACTGCTACCTGA
CAGGGCGTGTCAACATGAAGGCGGTGGAGGTGACAATCCAGAACCTG
ATTGGCTCTGGCATGGACCCCAAGACGGAGAACAACCCCTACCTGGGC
TTCATCTACACCTCCTCCAGGAGCGTGCACAAAAGATCTCGCACGGG
AACACCGCACGCCATGCCAGCGAGTATGGCGACAAGGTGCTGGGCAA
GATCTGCGGCGTAATCGCACAGGATGAGGGCCGGCACGAGATCGCCT
ACACGCGCATTGCGTCAGAGCTGTTACAGGCGAGACCCGTCCGGCACC
CGATTGCGTTTCGACAGACATGATGCGCAAGCAGATTGTGATGCCCCCC
ACCTGATGGACGACATGGAGCACGGCAACAAGACGGGCCGCAACCTG
TTTTACAGACTTCTCCAACGTGGCGCAGGCCACGGGCACCTACACAGCC
TTCGACTACGCGGACATCATGGACCACCTGCTGAAGAAGTGGGACATT
GAGCACCTGACGGCCTGACGGCCGAGGCCGCCGCGGCGCAGGACTA
CGTGTGCAAGCAGCCCAACCGCATCCGCAGCCTGTCCGAGCGCAGCAT
GGCGCGCCGCGCCAAGGCCAAGAAGGACGAGACGCCCTTCTCCTGGA
TCTACGGCCGCACCGTCAACTGCTAGATGTGGGCTGTGCGATGTGGAA
GTGCTTGCCAGACTGGCCGCACTGTTGACTGCTGGATGCGCCATGGCG
CATATGGAGTGCTTGTACACCCGTGCCGCATCATGCACAGCCATGTG
CCTGGTATACAAGCCAAGGACCCTGCGGGAGTGTGATGGGGCTTGCTT
CTCAAGCCCCTGAGTGTGTGAGGATCGTGTTGAGGCTCAGCAATGGC
ATAGGCTGATGGGACGTCATTCCTGCTCGCTAGGTAAGGGAGCACA
CGGCAGGTGGCTGATTTGTGATGAGGTTTCAGGGCAGCATGTCACCGGT
CGGTCAGGTGGATGAGGTTGCAAAGTTGGAAAAATCCATGCTGGGTGT
GGATTGCTTCGGTCAGTCATGTTGCTGGGCTGCAACACATGTGTCAGC
TCCTACAGCTACCCATCATTCTTGCCTGTTGTGCGGTGTTCCGGCCAGGC
CATACCTGTTTCAGGCGCCCTGTGTGTGCAAGTCTGTGCTACACCCTTT
TAGGAACATATTGCACTCCATGGGTATGGCAGGCTAGATGGCATGGCA
ACTCAAAGAGGCAATCAAAGAAGTGGGACAGTATATACCATTATTGCT
CCCCTGTGTGGCTGTTGGCATTCTGATTTAGGCCTGTGACTTGCAACCA
GCCAGGGGCGGTGCAAGATATTCCATGTGAGTGGCAGATTAAGCATGT
TGGTGATGATTGTGAGAATGACTGATGGAAGTCGACATTGCATGCGA
GCGGCCATGGTGTGCGATCTGTATGAGAGTGAGAGCGGTAGGATCAA
GAAGTGCTTGTACAACACTAGCGACACTAGATACAGTGGCTCCATGGTGG
TGGTTGACATACGCCTCCTTGGCAGCCTCGGGCGGTGGTATTGAGAAC
GTTGGTCCACATCCAGGGTCCACCTGGATTTGTAAGTACAGTGCAGCGC
GCTGTA AACGCTGCAGGGCAAAAAAAAAAAAAAAAAAAAAAAAAAAAA
AAAA

```

**Figure S1.** The full length cDNA sequence of *Mi $\Delta$ 9FAD*. The predicted chloroplast transit peptides are underlined. The initiation codon and termination codon are in boxes.
